# Supplementary material for: The paradox-breaking panRAF plus SRC family kinase inhibitor, CCT3833, is effective in mutant KRAS-driven cancers
Source: PubMed Central journal article supplement (PMC7839839; doi:10.1016/j.annonc.2020.10.483), 2021-02

# Saturno et al

## Supplementary Figure S1

**A**

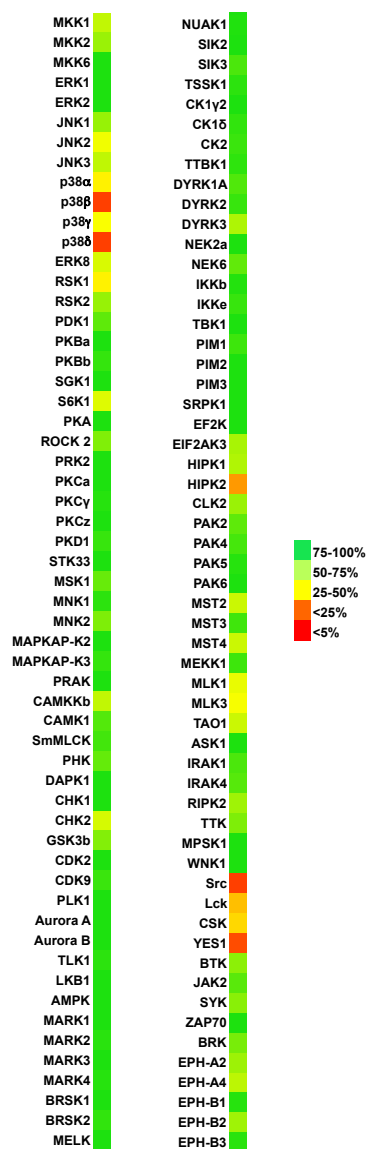

**B**

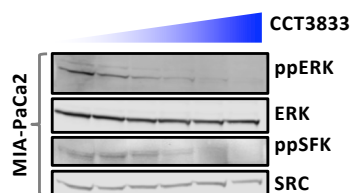

Saturno et al  
**Supplementary Figure S2**

**A**

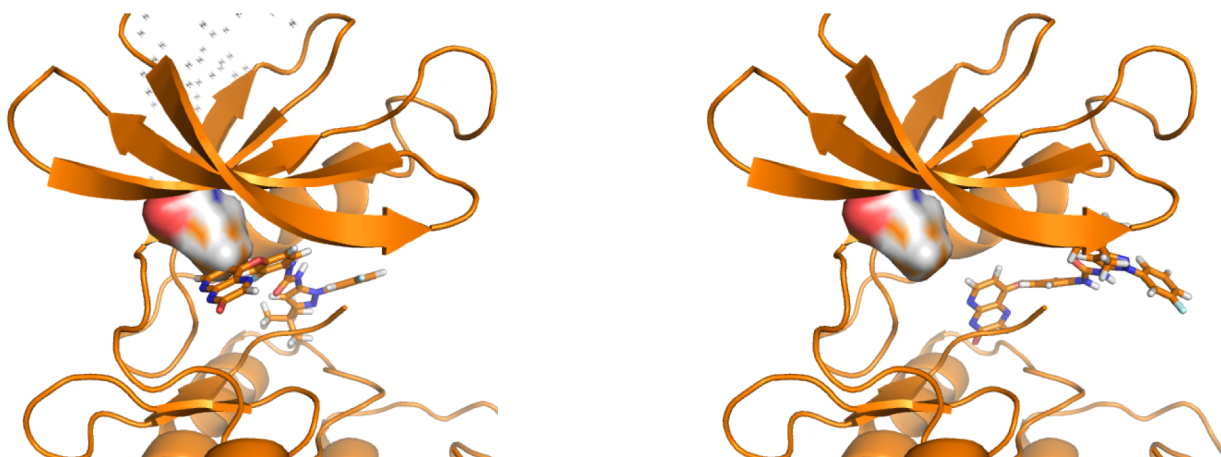

**B**

HEK-293

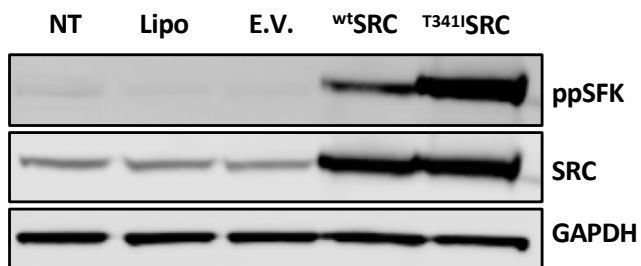

**C**

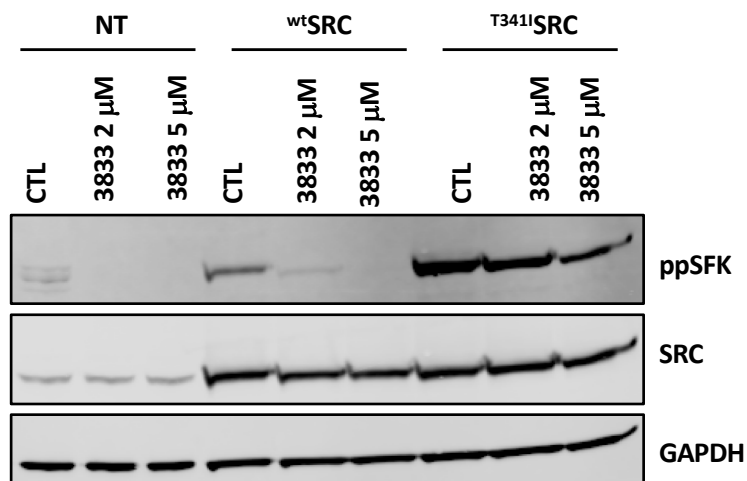

**D**

HCT-116

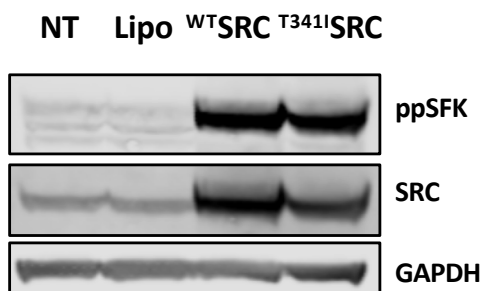

**E**

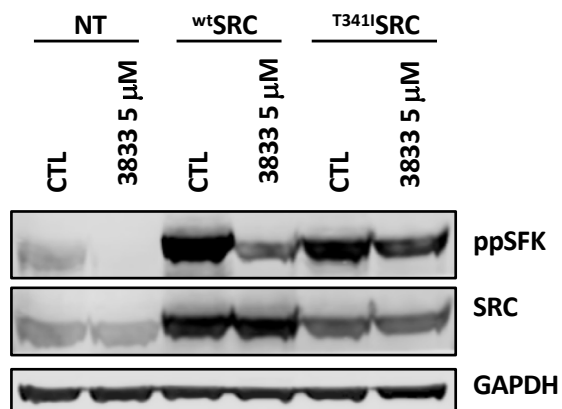

Saturno et al  
Supplementary Figure S3

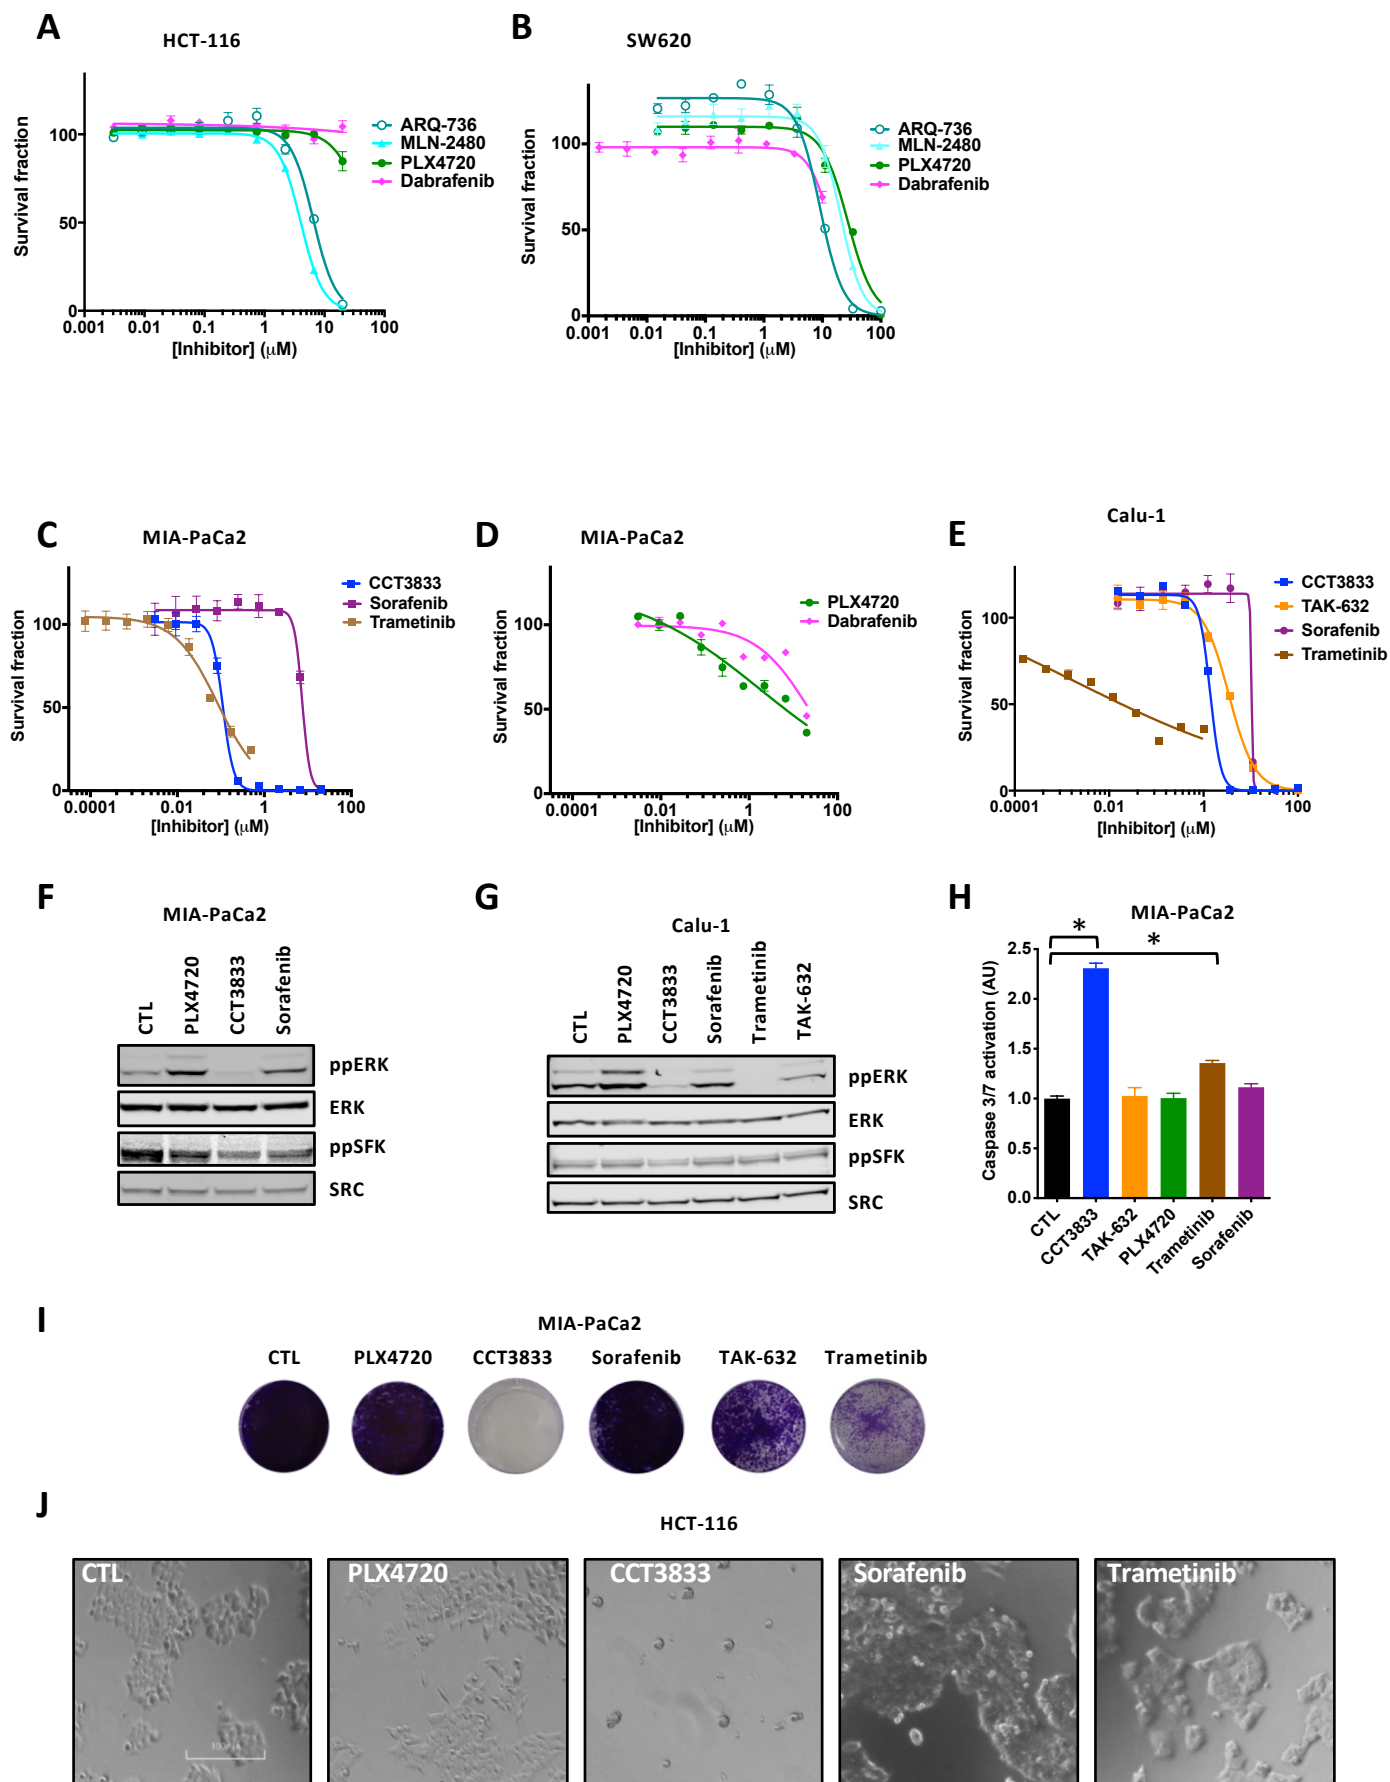

Saturno et al  
Supplementary Figure S4

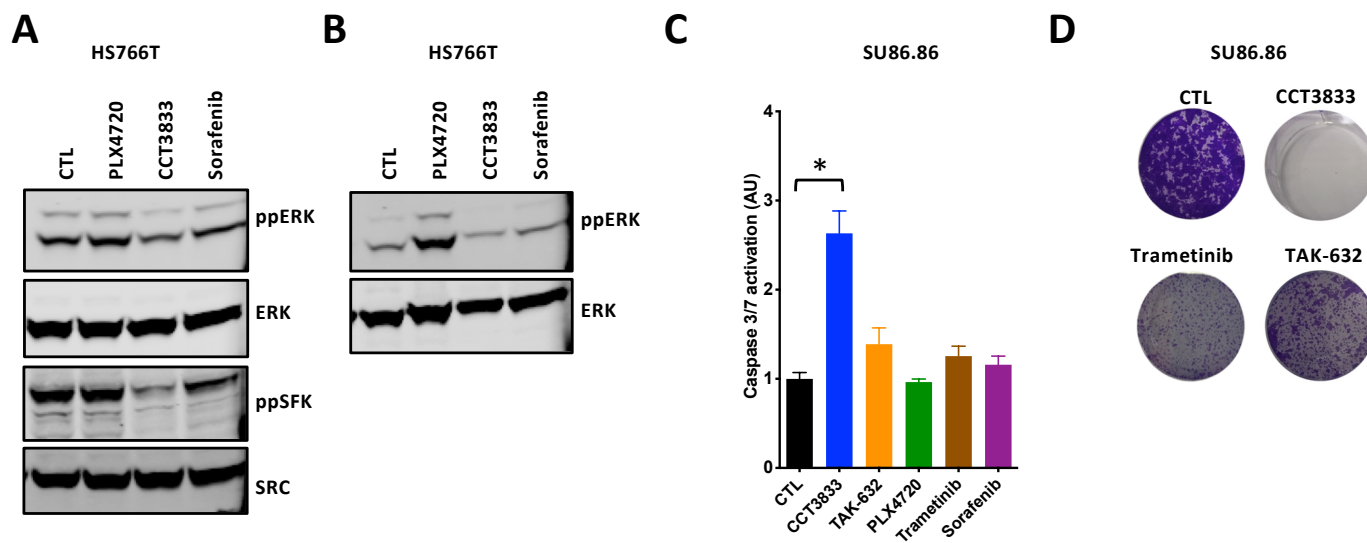

Saturno et al  
Supplementary Figure S5

**A**

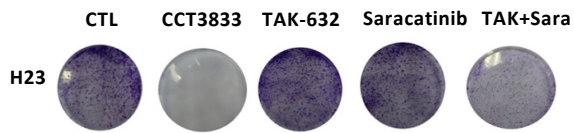

**B**

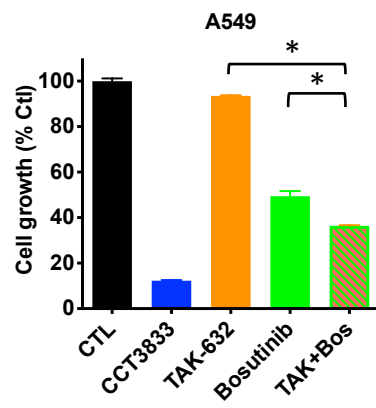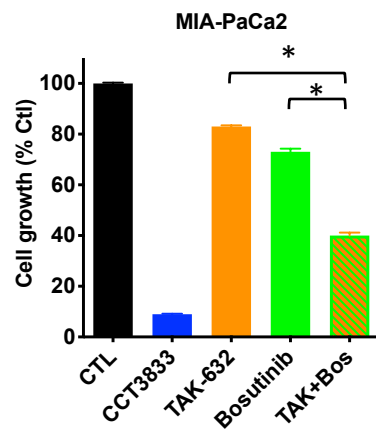

Saturno et al  
Supplementary Figure S6

**A**

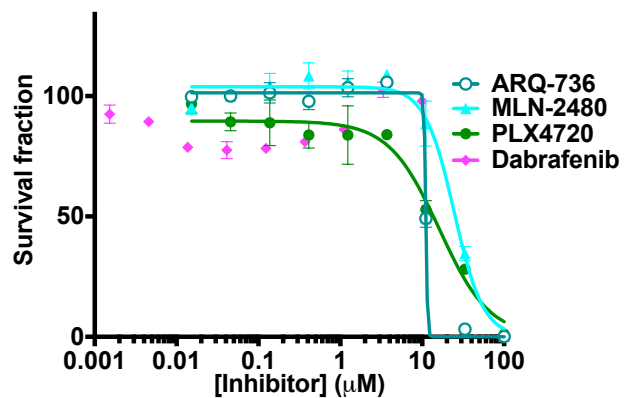

**B**

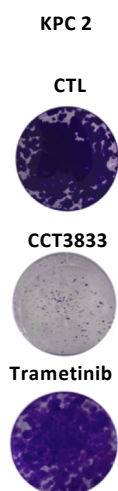

**C**

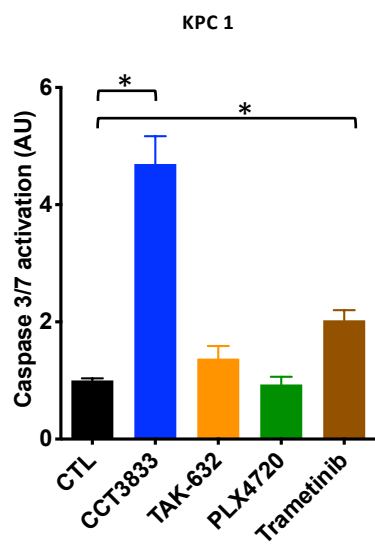

**D**

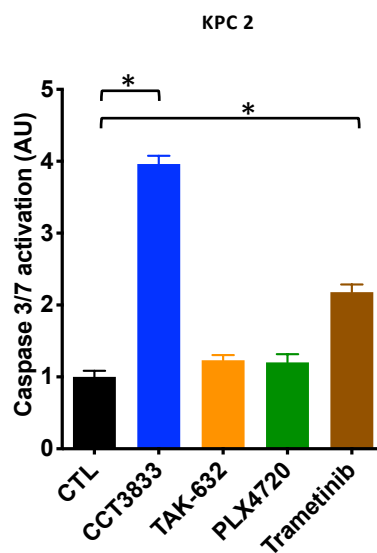

Saturno et al  
**Supplementary Figure S7**

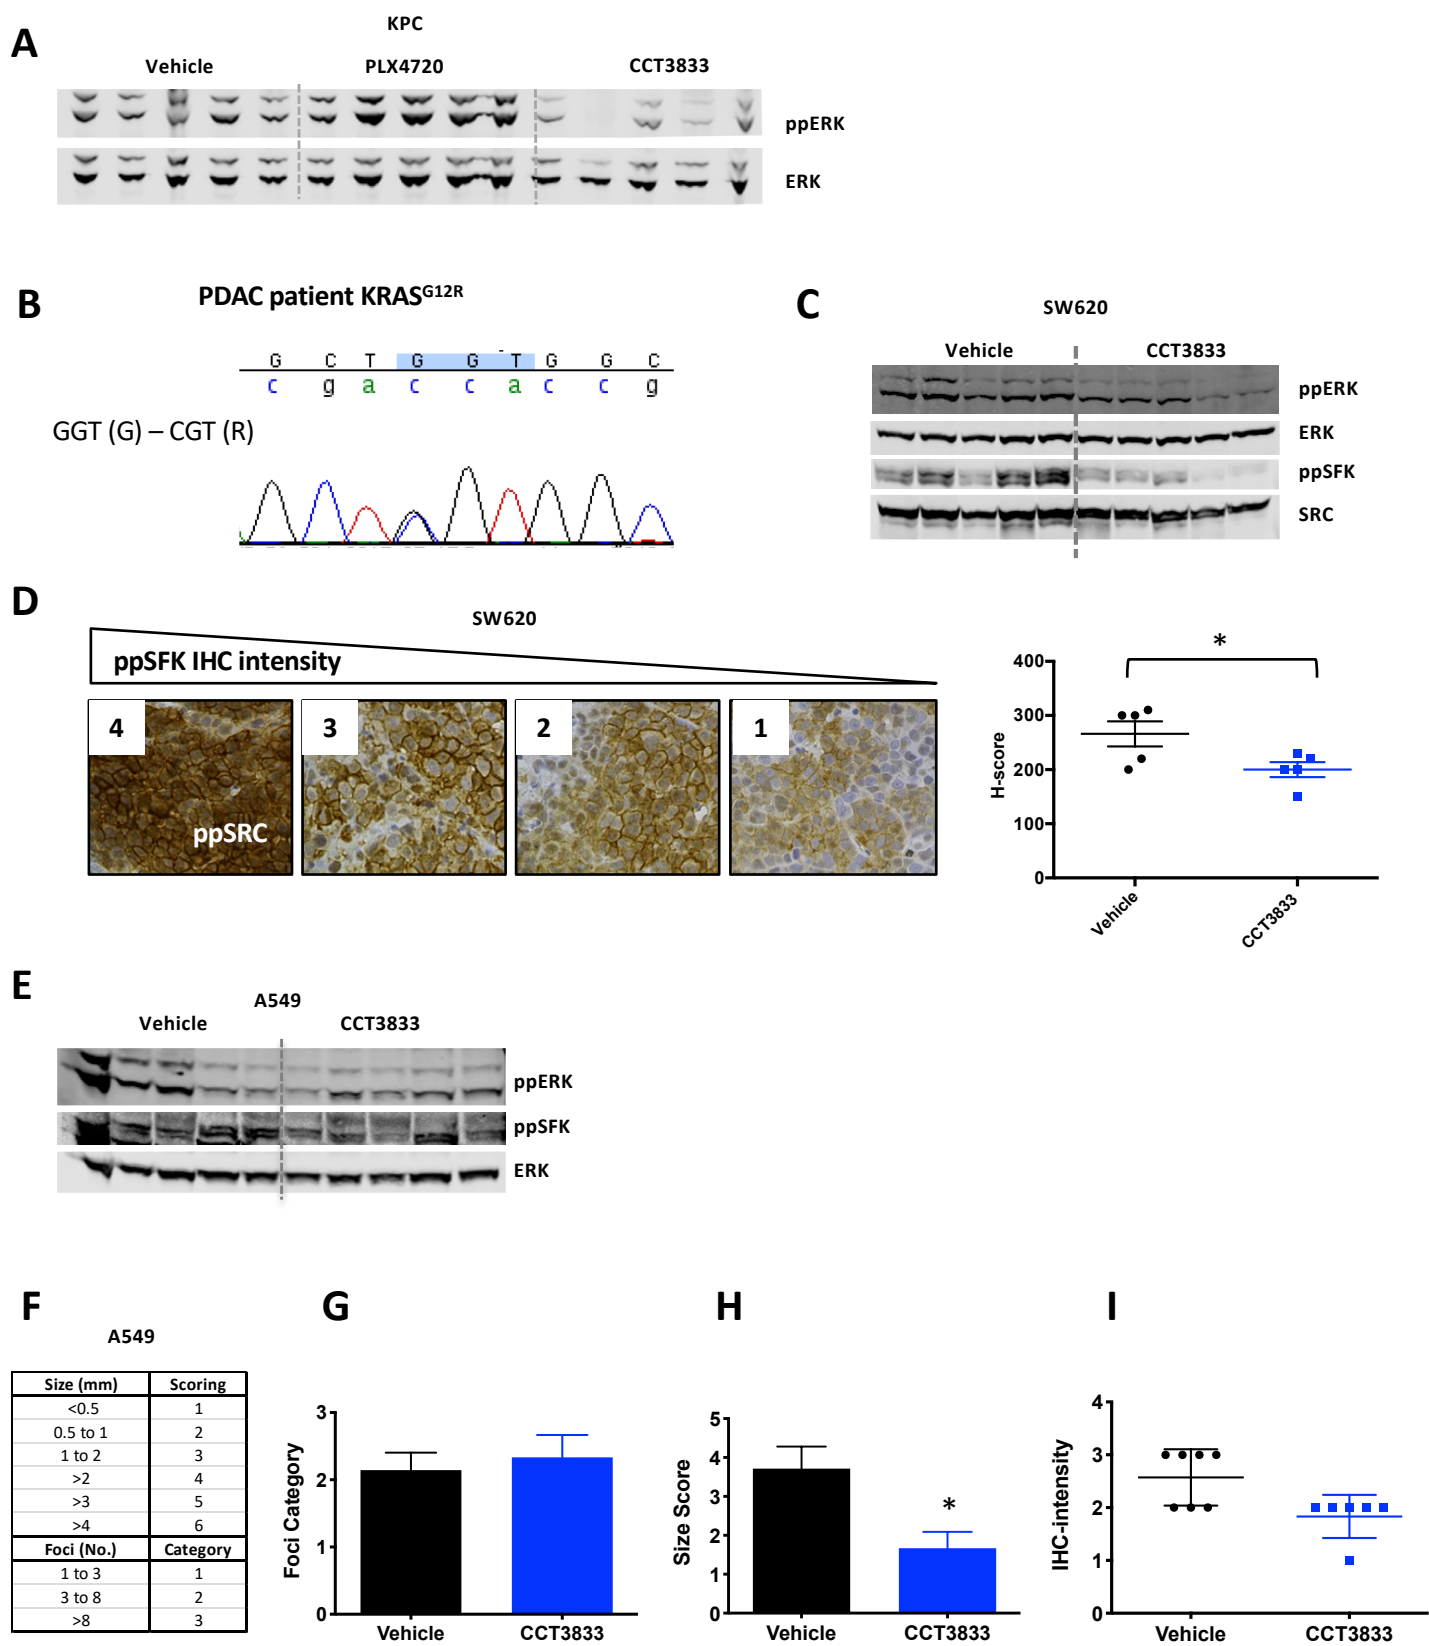

Saturno et al  
Supplementary Figure S8

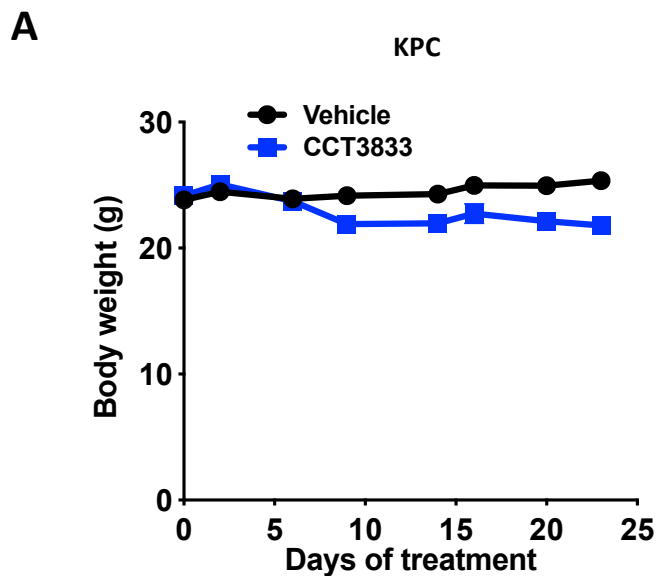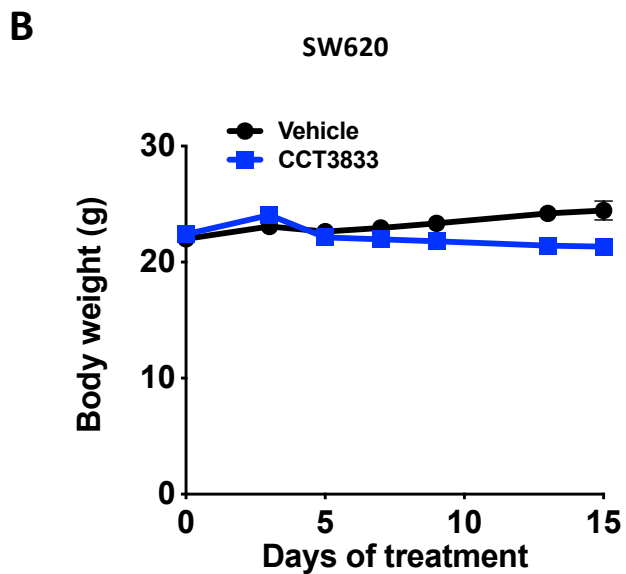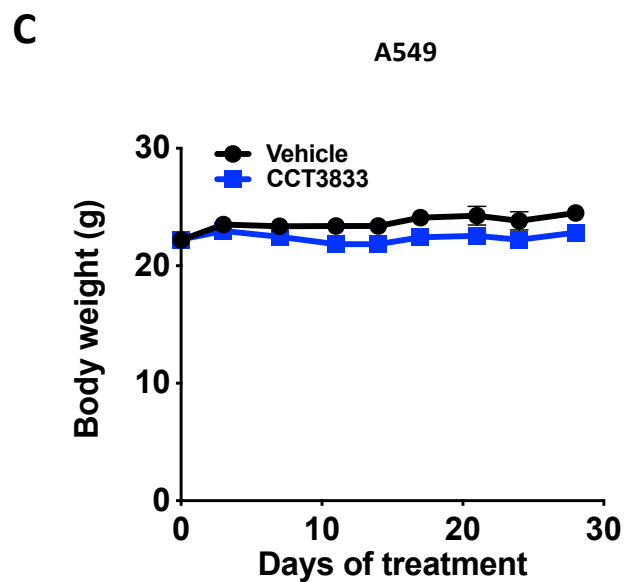

Supplement: mmc1.pdf [file mmc1.pdf]
